# Supplementary material for: Synaptically-Competent Neurons Derived from Canine Embryonic Stem Cells by Lineage Selection with EGF and Noggin
Source: PubMed Central journal article supplement (PMC3096636; doi:10.1371/journal.pone.0019768), 2011-05-17
Supplement: pone.0019768.s001.pdf [file pone.0019768.s001.pdf]

Table S1: Antibody detail and canine-specific immunoreactivity

| <b>Antibody</b>                     | <b>Company</b>   | <b>Catalogue</b> | <b>Host</b> | <b>Dilution</b> | <b>Localization</b> |
|-------------------------------------|------------------|------------------|-------------|-----------------|---------------------|
| OCT4                                | Santa Cruz       | SC9081           | Rb          | 1:500           | Nucleus             |
| OCT4                                | Santa Cruz       | SC8628           | Gt          | 1:400           | Nucleus             |
| SOX2                                | Stem Cell Tech   | 1438             | Rb          | 1:400           | Nucleus             |
| SSEA-3                              | Chemicon         | MAB4303          | Mo          | 1:250           | Surface             |
| SSEA-4                              | Chemicon         | MAB4304          | Mo          | 1:250           | Surface             |
| TRA-1-81                            | Chemicon         | MAB4381          | Mo          | 1:250           | Surface             |
| FGFR1                               | Chemicon         | MAB125           | Mo          | 1:250           | Surface             |
| Vimentin                            | Chemicon         | AB5733           | Chk         | 1:2000          | Cytoplasmic         |
| Vimentin                            | Chemicon         | MAB3400          | Mo          | 1:500           | Cytoplasmic         |
| 3CB2                                | DSHB             | 3CB2             | Mo          | 1:500           | Cytoplasmic         |
| MOSP                                | Chemicon         | MAB328           | Mo          | 1:500           | Cytoplasmic         |
| GFAP                                | Chemicon         | AB5804           | Rb          | 1:2000          | Cytoplasmic         |
| GFAP                                | Chemicon         | MAB360           | Mo          | 1:2000          | Cytoplasmic         |
| TUBB3 (Tuj1)                        | Sigma            | T8660            | Mo          | 1:2000          | Cytoplasmic         |
| MAP2ab                              | Chemicon         | MAB378           | Mo          | 1:5000          | Dendrite            |
| MAP2                                | Chemicon         | AB5622           | Rb          | 1:2000          | Dendrite            |
| NF-H                                | Chemicon         | AB5539           | Chk         | 1:500           | Axon                |
| Synapsin                            | Synaptic Sys     | 106-001          | Mo          | 1:100           | Synaptic            |
| DiO (Vybrant)                       | Molecular probes | V-22886          | n/a         | 1:200           | Membrane            |
| Dil (Vybrant)                       | Molecular probes | V-22885          | n/a         | 1:200           | Membrane            |
| <b>Not Reactive to Canine Cells</b> |                  |                  |             |                 |                     |
| Nestin                              | BD Pharmingen    | 611658           |             |                 |                     |
| Nestin                              | DSHB             | RAT-401          |             |                 |                     |
| Radial Glia                         | DSHB             | RC2              |             |                 |                     |
| Olig                                | DSHB             | Olig             |             |                 |                     |
| RIP                                 | DSHB             | RIP              |             |                 |                     |
| O4                                  | Neuromics        | MO15002          |             |                 |                     |
| VGlut2                              | Chemicon         | AB5907           |             |                 |                     |
| Synaptotagmin                       | DSHB             | Synaptotagmin    |             |                 |                     |
| PSD95                               | NeuroMab         | K28/43           |             |                 |                     |

Abbreviations: Chk, chicken; Gt, goat; Mo, mouse; Rb, rabbit.
