# Supplementary material for: Synaptically-Competent Neurons Derived from Canine Embryonic Stem Cells by Lineage Selection with EGF and Noggin
Source: PubMed Central journal article supplement (PMC3096636; doi:10.1371/journal.pone.0019768), 2011-05-17
Supplement: pone.0019768.s002.pdf [file pone.0019768.s002.pdf]

Table S2: Primer sequences and details for canine-specific RT-PCR

| <b>Gene</b>   | <b>Sequence*</b>                              | <b>Size</b>      | <b>E</b> |
|---------------|-----------------------------------------------|------------------|----------|
| RNA Pol II    | GACGAGAAAGGCTTGGTCAG<br>ATGGGTAGGCTTGGAGAGGT  | 192              | 1.95     |
| GAPDH         | GCCCTCAATGACCACTTTGT<br>TCCTTGGAGGCCATGTAGAC  | 101              | 1.92     |
| RPS18         | ACTGAGGATGAGGTGGAACG<br>ACACGAAGTCCCCAAAAGTG  | 215              | 1.92     |
| OCT4          | AGTGAGAGGCAACCTGGAGA<br>TCAGGGAGAGGGACTGAGGA  | 303 <sup>a</sup> | 1.89     |
| Nestin        | CAGCAGCTAGCACACCTCAA<br>GCAAGGAGAGGGAAGTAGGG  | 220 <sup>a</sup> | 1.77     |
| TUBB3         | AGCCAAGTTCTGGGAAGTCA<br>CCCACTCTGACCAAAGATGAA | 238              | 1.93     |
| GFAP          | AGATCCACGATGAGGAGGTG<br>TCTTAGGGCTGCTGTGAGGT  | 104              |          |
| MAP2          | AGAGGAGGTGTCTGCAAGGA<br>GTGATGGAGGTGGAGAAGGA  | 161              |          |
| PSD95         | GACGGGAGTGGTCAAGGTTA<br>GGCGAGCATAGTGAACCTCC  | 120              |          |
| HPC-1 (STX1A) | AGTACAACGCCACACAGTCG<br>GTTCCCCTCTCCAGCATGT   | 122              |          |
| STX1B         | CAACAAGGTTCCGGTCCAAGT<br>ACTGGGTCGCGTTATATTCG | 158              |          |
| Synaptopodin  | GTTGGTGGGTTTCATCAGCTT<br>CCAAAGACCACGGAAGTGTT | 165              |          |
| MBP           | AGAAGAGCAACAAGGCTGGA<br>TTGTTCTGCTCCACATCTGC  | 124              |          |
| NEFH          | CTCAAAGGCACCAAGGACTC<br>CAAAGCCAATCCGACATTCT  | 244              |          |
| Synaptophysin | GCCACTGACCCAGAGAACAT<br>TCCTTGAACACGAACCACAG  | 167              |          |

\* Primer sets are written 5' to 3'; forward, top; reverse, bottom.

<sup>a</sup> Elongation time, 20 sec.

Abbreviations: E, efficiency of primer set.
